# Supplementary material
Source: MDPI journal article supplement (https://www.mdpi.com/2079-6412/9/3/186)
Supplement: s1 [file s1]

# Supplementary Material: Fibre Laser Treatment of Beta TNZT Titanium Alloys for Load-Bearing Implant Applications: Effects of Surface Physical and Chemical Features on Mesenchymal Stem Cell Response and *Staphylococcus aureus* Bacterial Attachment

Clare Lubov Donaghy <sup>1,\*</sup>, Ryan McFadden <sup>1</sup>, Graham C. Smith <sup>2</sup>, Sophia Kelaini <sup>3</sup>, Louise Carson <sup>4</sup>, Savko Malinov <sup>1</sup>, Andriana Margariti <sup>3</sup> and Chi-Wai Chan <sup>1,\*</sup>

<sup>1</sup> School of Mechanical and Aerospace Engineering, Queen's University Belfast, Belfast, BT9 5AH, UK; rmcfadden02@qub.ac.uk (R.M.); S.Malinov@qub.ac.uk (S.M.)

<sup>2</sup> Department of Natural Sciences, University of Chester, Thornton Science Park, Chester CH2 4NU, UK; graham.smith@chester.ac.uk

<sup>3</sup> Centre for Experimental Medicine, Queen's University Belfast, Belfast, BT9 7BL, UK; s.kelaini@qub.ac.uk (S.K.); a.margariti@qub.ac.uk (A.M.)

<sup>4</sup> School of Pharmacy, Queen's University Belfast, Belfast, BT9 7BL, UK; l.carson@qub.ac.uk

\* Correspondence: cdonaghy38@qub.ac.uk (C.L.D.); c.w.chan@qub.ac.uk (C.C.)

Calculations related to laser energy and intensity for the fibre laser surface treatment:

The focal spot diameter ( $d_{e-2}$ ) can be obtained by Equation (1):

$$d_{e-2} = \frac{4\lambda f}{\pi D_{e-2}} \times M^2, \quad (1)$$

where  $d_{e-2}$  is focal spot diameter,  $\lambda$  is the wavelength of the laser beam,  $f$  is the focal length of lens,  $D_{e-2}$  is the diameter of the beam before the lens and  $M^2$  is the beam mode parameter of the fibre laser.

Given that  $\lambda$ ,  $f$ ,  $D_{e-2}$ , and  $M^2$  are 1.064  $\mu\text{m}$ , 125 mm, 5 mm, and 1.2 respectively.

By substituting these values into Equation (1), the focal spot diameter ( $d_{e-2}$ ) is 41  $\mu\text{m}$ .

The laser spot diameter at the stand-off distance of 1.5 mm can be obtained using simple trigonometry. After calculations, it is 100  $\mu\text{m}$ .

The laser intensity ( $\text{W}/\text{cm}^2$ ) can be obtained by Equation (2):

$$\text{Laser Intensity } (\text{W}/\text{cm}^2) = \frac{\text{Laser Power } (W)}{\text{Spot Area } (\text{cm}^2)}, \quad (2)$$

The laser spot area at the stand-off distance of 1.5 mm is  $7.9 \times 10^{-3} \text{ mm}^2$ , and the laser power is 30 W.

By substituting these values into Equation (2), the laser intensity is  $3.8 \times 10^5 \text{ W}/\text{cm}^2$ .

The laser energy (J) can be calculated by Equation (3):

$$\text{Laser Power } (W) = \frac{\text{Laser Energy } (J)}{\text{Processing Time } (s)}, \quad (3)$$

The processing time (s) for each laser track can be calculated by Equation (4):

$$\text{Processing Time } (s) = \frac{\text{Scanning Distance } (mm)}{\text{Scanning Speed } (\frac{mm}{s})}, \quad (4)$$

Given that the scanning speed are 100 and 200 mm/s, scanning distance (or length of each laser track) is 6 mm, and the laser power is 30 W.

By substituting the values into Equations (3) and (4), the laser energy at the two speeds are 1.8 and 0.9 J respectively.
